# Supplementary material for: Combining carbon ion irradiation and non-homologous end-joining repair inhibitor NU7026 efficiently kills cancer cells
Source: Springer Nature journal article supplement (doi:10.1186/s13014-015-0536-z), 2015-11-09

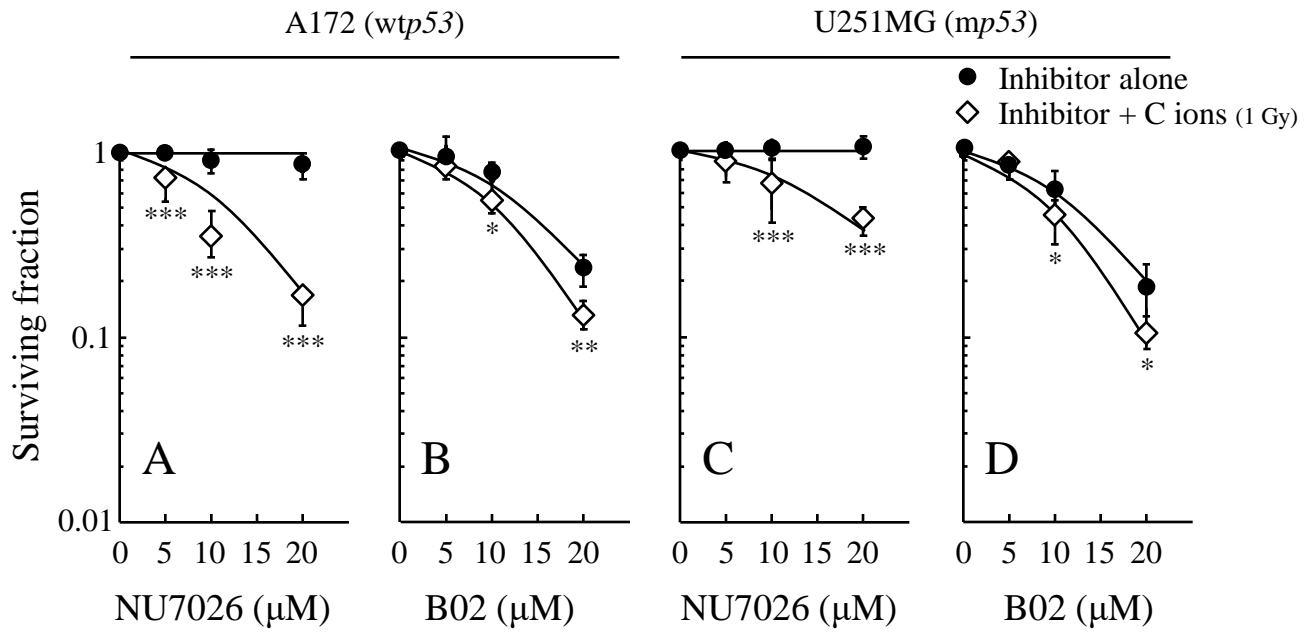

Supplement: MOESM1 [file 9774074]
